# Supplementary material for: Predicting the three-dimensional folding of cis-regulatory regions in mammalian genomes using bioinformatic data and polymer models
Source: PubMed Central journal article supplement (PMC4815170; doi:10.1186/s13059-016-0909-0), 2016-03-31
Supplement: 13059_2016_909_MOESM15_ESM.pdf [file 13059_2016_909_MOESM15_ESM.pdf]

| Symbol        | Description                                                                                                                                                                                    | Value (simulation units) |                                            |
|---------------|------------------------------------------------------------------------------------------------------------------------------------------------------------------------------------------------|--------------------------|--------------------------------------------|
| $\Delta t$    | time step of numerical integration of Eq. (S1)                                                                                                                                                 |                          | $0.01 \tau_{LJ}$                           |
| T             | total run time of each simulation                                                                                                                                                              |                          | $8 \times 10^4 \tau_{LJ}$                  |
| $m_i$         | mass of bead $i$                                                                                                                                                                               | chromatin bead           | 1                                          |
|               |                                                                                                                                                                                                | protein complex          | 1                                          |
| $\gamma_i$    | friction coefficient                                                                                                                                                                           | chromatin bead           | 2                                          |
|               |                                                                                                                                                                                                | protein complex          | 2                                          |
| $d_{ii}$      | diameter of bead $i$                                                                                                                                                                           | chromatin bead           | $\sigma$                                   |
|               |                                                                                                                                                                                                | protein complex          | $\sigma$                                   |
| $R_0$         | equilibrium FENE bond length for chromatin beads                                                                                                                                               |                          | $1.6 \sigma$                               |
| $K_{FENE}$    | energy of the FENE bonds                                                                                                                                                                       |                          | $30 k_B T$                                 |
| $K_{BEND}$    | energy of the bending interaction for the chromatin fibre                                                                                                                                      |                          | $4 k_B T$                                  |
| $r_{cut}$     | cut-off for Lennard-Jones interaction between protein complex and protein binding chromatin bead                                                                                               |                          | $1.4 \sigma$                               |
| $\epsilon$    | energy for the interaction between protein complexes and binding chromatin beads                                                                                                               |                          | $5.39 k_B T$<br>( $\epsilon' = 10 k_B T$ ) |
| $r_{contact}$ | separation below which two chromatin beads are defined as being “in contact”, i.e. we assume the beads are interacting in a way analogous to that which would give a signal in a 3C experiment |                          | $2.75 \sigma$<br>(44 nm)                   |

**Additional file 15: Table S1: List of all simulation parameters.** Parameters are given in simulation units; see Additional file 2: Supplementary Methods for details of how these relate to physical units.
