# Supplementary material for: Predicting the three-dimensional folding of cis-regulatory regions in mammalian genomes using bioinformatic data and polymer models
Source: PubMed Central journal article supplement (PMC4815170; doi:10.1186/s13059-016-0909-0), 2016-03-31
Supplement: 13059_2016_909_MOESM16_ESM.pdf [file 13059_2016_909_MOESM16_ESM.pdf]

| Probe      | Oligonucleotides 5'-3'                                                                                                                                                                               |
|------------|------------------------------------------------------------------------------------------------------------------------------------------------------------------------------------------------------|
| pMPG       | CTGGGGCAGACAGCCATGGTCAGTGCCCTTCCCATACTCACAGCAACCATCTGGGTGAGCgatata<br>caagcttatcgataccgctcgac<br><br>TCAGCGAGTCGCCGACAAGAACCTATGGGCAGTGAGTCTGCTCAGCTCAAACAGGGGCCcaccg<br>cggtaggagctccaatt           |
| pE         | AAGCATTGAGGGCTAAGGATGTAGCTTAGTAATAGAGGCCCTGAGCTCTATGACTACCACgatata<br>caagcttatcgataccgctcgac<br><br>GAAGATGTCTCTGAATGTTCCAAGAGTTACAGTCAGTATTTTCAATTTAAAAATGTACATACcaccg<br>cggtaggagctccaattc       |
| p $\alpha$ | CAAATTGACATGAATCAAGAATGACAACCTGAGTCTTACATGGACTGTATCCAGGGTCACAgatata<br>caagcttatcgatac<br><br>GGTATCACACACCAGGCACACATATACACATGTACGGACACATCACACACCAGGCATACATGGAC<br>AGAAGcaccgaggtaggagctccaat        |
| p58        | ATGGGCTTTATTCTCTCTGTCCCTCTGCAACACTGGTGTACACAACACGAGTCTACCATCCTTA<br>AAGcaccgaggtaggagctccaattc<br><br>CGCCTGCAGCCAGTTCCTTTTATACCTTTACCAACATGACTAGCTTCCTAAGCAGGGACATGga<br>tatcaagcttatcgataccgctcgac |

**Additional file 16: Table S2: Oligonucleotide sequences for FISH probes.** Sequences used to amplify the vector backbone are shown in lower case, and regions used to subclone probe sequences in upper case.
